# Supplementary material
Source: PubMed Central journal article supplement (PMC4394632)
Supplement: NIHMS678870-supplement-Sipplemental_Information.pdf [file NIHMS678870-supplement-Sipplemental_Information.pdf]

# **pH-Dependent Conformational Transient States Control Optical Properties in Cyan Fluorescent Protein**

Elena N. Laricheva,<sup>†</sup> Garrett B. Goh,<sup>†</sup> Alex Dickson,<sup>†</sup> Charles L. Brooks III<sup>\*,†,‡</sup>

<sup>†</sup>Department of Chemistry and <sup>‡</sup>Biophysics Program, University of Michigan, Ann Arbor, Michigan, 48109, United States

## Supporting Information

**S1. Calculating absorption properties of a synthetic chromophore:** The calculations of the excitation energies and oscillator strength for the five lowest energy transitions in chromophore were performed using several scenarios, all providing the same qualitative picture: (i) gas-phase TDDFT on the gas-phase optimized geometries (denoted as “Gas-phase//gas-phase”; (ii) PCM TDDFT on the gas-phase optimized geometries (“PCM//gas-phase”); and (iii) PCM TDDFT on the PCM optimized geometries (“PCM//PCM”).

**Table S1.** TDDFT//B3LYP/6-31G\* vertical excitation energies and oscillator strength for the 5 lowest energy transitions in CRF

| State                        | Transition | Gas-phase//gas-phase |             | PCM//gas-phase |             | PCM//PCM    |             |
|------------------------------|------------|----------------------|-------------|----------------|-------------|-------------|-------------|
|                              |            | Energy, eV           | $f$         | Energy, eV     | $f$         | Energy, eV  | $f$         |
| Neutral<br>(proto-<br>nated) | 0→1        | <b>3.31</b>          | <b>0.60</b> | <b>3.17</b>    | <b>0.70</b> | <b>3.15</b> | <b>0.71</b> |
|                              | 0→2        | 3.74                 | <0.1        | 3.78           | <0.1        | 3.77        | <0.1        |
|                              | 0→3        | 3.86                 | <0.1        | 3.90           | <0.1        | 3.85        | <0.1        |
|                              | 0→4        | 4.05                 | <0.1        | 3.96           | <0.1        | 3.95        | <0.1        |
|                              | 0→5        | 4.24                 | <0.1        | 4.29           | <0.1        | 4.27        | <0.1        |
| Charged                      | 0→1        | 3.02                 | <0.1        | <b>2.99</b>    | <b>0.95</b> | <b>2.96</b> | <b>0.97</b> |
|                              | 0→2        | <b>3.10</b>          | <b>0.87</b> | 3.62           | <0.1        | 3.62        | <0.1        |
|                              | 0→3        | 3.57                 | <0.1        | 3.91           | <0.1        | 3.91        | <0.1        |
|                              | 0→4        | 3.67                 | <0.1        | 4.11           | <0.1        | 4.11        | <0.1        |
|                              | 0→5        | 3.74                 | <0.1        | 4.16           | <0.1        | 4.16        | <0.1        |

Those values that are highlighted refer to the strongest lowest energy transitions for both charged and neutral forms, with the values of bathochromic shift equal to 23-25 nm dependent on the level of theory used. All calculations were performed using Gaussian 03.<sup>5</sup> As noted in the paper, the computed vertical excitation energies for the lowest energy 0→1 transition in neutral form are in quantitative agreement with both experiment<sup>6</sup> and previous computational studies,<sup>3,4</sup> and,

thus, the origin of the underestimation in the bathochromic shift between the neutral and the charged forms originates from the uncertainties in the TDDFT-computed energies for anionic state.<sup>7</sup>

## S2. Building input structures and calculating $pK_a$ of a model compound:

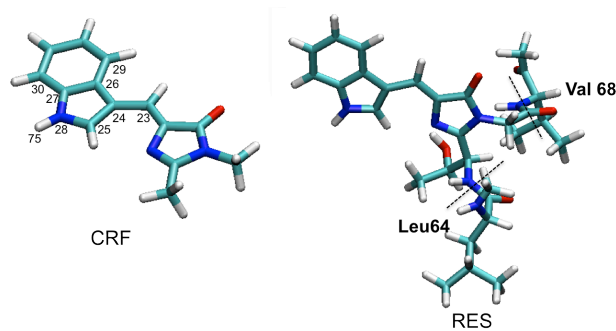

**Figure S1.** Structures of the CRF and RES chromophores. Numbers illustrate those atoms that constitute the titratable fragment. The rest of the atoms belong to the environment. Dashed lines show positions at which the chromophore is bound to the protein (at residues Leu64 and Val68).

Atoms included in the patch representing the charged (deprotonated) form of CRF were those that differed in charge between protonated and deprotonated forms of CRF, such as nitrogen of the indole ring (N28), all of its adjacent carbon atoms (C24, C25, C26, C27), two carbons from the six-membered ring (C29, C30), and a single carbon from the bridging  $\text{CH}_2^-$  moiety (C23) connecting two heterocyclic rings. In order to distinguish the atoms of the patch, in the dual topology approach they were defined as N28m, C24m, C26m, C27m, N28m, C29m, and C30m.

### S2a. Parameterizing the chromophore

CHARMM parameters for both CRF and RES were derived following the procedure previously employed for adenine and cytosine nucleobases, as reported in ref.<sup>10</sup>. In particular, partial charges for the neutral (protonated) and charged (deprotonated) forms were first generated using the MMFF94 force field.<sup>15</sup> To assign a CHARMM charge distribution for the charged form, the difference in the MMFF94 charges was then added to the partial charge parameters generated for the neutral form using the multipurpose atom typer MATCH.<sup>16</sup> The atoms differing in charge between the two forms, as well as the corresponding atom types, are shown in Figure S1 and Table S2. All bonded parameters (bond, angle, dihedral) for charged species were adapted from

those generated by MATCH for the neutral form. A complete list of parameters is provided at the end of the Supporting Information.

**Table S2.** Charges and atom types for neutral and charged states of titratable CRF and RES

| Atom | Neutral   |                | Charged   |                |
|------|-----------|----------------|-----------|----------------|
|      | Atom type | Partial charge | Atom type | Partial charge |
| C23  | C2D1      | -0.0900        | C2D1m     | -0.1030        |
| C24  | C251      | -0.1600        | C251m     | -0.1470        |
| C25  | C251      | -0.0400        | C251m     | 0.2616         |
| C26  | C2C0      | 0.0300         | C2C0m     | -0.0110        |
| C27  | C2C0      | 0.1500         | C2C0m     | 0.4106         |
| N28  | N251      | -0.5200        | N251m     | -1.7532        |
| C29  | C261      | -0.1150        | C261m     | -0.0740        |
| C30  | C261      | -0.1150        | C261m     | -0.0740        |
| H75  | HGP1      | 0.3700         | —         | —              |

**S2b. Calculating the  $pK_a$  value of a model compound**

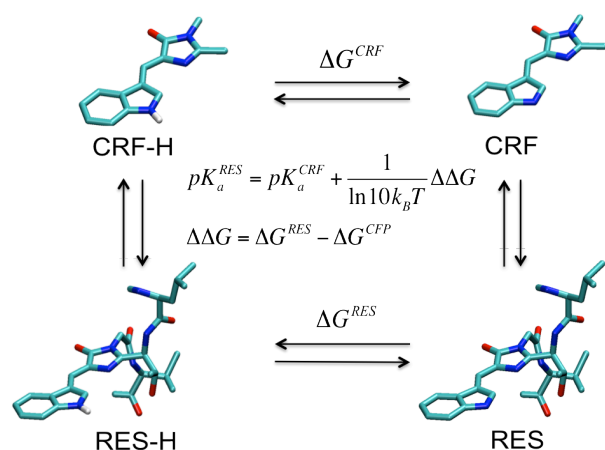

**Figure S2.** Thermodynamic cycle showing alchemical transformations of CRF to RES with two deprotonation reactions (CRF-H/CRF<sup>-</sup> and RES-H/RES<sup>-</sup>) considered in FEP/TI calculations.

### S3. Details of the CPHMD<sup>MSλD</sup> simulations

Table S3. Parameters for the model potential at pH=pK<sub>a</sub>

| Residue | F <sup>fixed</sup> (kcal/mol) | F <sup>var</sup> (kcal/mol) | Reference pK <sub>a</sub> |
|---------|-------------------------------|-----------------------------|---------------------------|
| RES     | 125.7                         | 66.0                        | 12.7                      |

The transitions in  $\lambda$ -space are illustrated for RES in Figure S3:

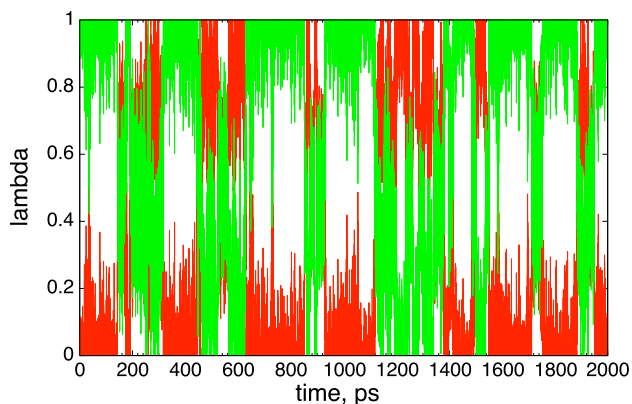

Figure S3. Transitions between the protonated and unprotonated states of RES during the 2 ns-long production run of the CPHMD<sup>MSλD</sup> simulations with F<sup>fixed</sup> =125.7 and F<sup>var</sup> =66.0.

### S4. Determining F<sup>open</sup> from CPHMD<sup>MSLD</sup> simulations

#### *Two-state model*

A simplified two-state model, considering an interconversion between one dominant open and one dominant closed state was recently applied to describe protonation equilibria in the buried Lys mutants of staphylococcal nuclease.<sup>24</sup> Below we provide the details on the derivation of the ratio of open to closed states ( $R_{oc}$ ), which is defined as the total concentration of the former relative to the total concentration of the latter states.

Firstly, the equilibrium constant characterizing the deprotonation reaction for the open ( $K_{open}$ ) and closed ( $K_{open}$ ) states can be written as follows:

$$K_{open} = \frac{[Open][H^+]}{[OpenH]} \quad (1)$$

$$K_{closed} = \frac{[Closed][H^+]}{[ClosedH]} \quad (2)$$

Eq. (1) and (2) can then be rearranged into the following functional forms:

$$\frac{K_{open}}{[H^+]} + 1 = \frac{[Open] + [OpenH]}{[OpenH]} \quad (3)$$

$$\frac{K_{closed}}{[H^+]} + 1 = \frac{[Closed] + [ClosedH]}{[ClosedH]} \quad (4)$$

By dividing Eq. (3) by Eq. (4), we obtain:

$$\frac{[Open] + [OpenH]}{[Closed] + [ClosedH]} \frac{[ClosedH]}{[OpenH]} = \frac{\frac{K_{open}}{[H^+]} + 1}{\frac{K_{closed}}{[H^+]} + 1} \quad (5)$$

Using Eq. (5) we can now obtain the expression for  $R_{oc}$ :

$$R_{oc} = \frac{[Open] + [OpenH]}{[Closed] + [ClosedH]} = \frac{\frac{K_{open}}{[H^+]} + 1}{\frac{K_{closed}}{[H^+]} + 1} \frac{[OpenH]}{[ClosedH]} \quad (6)$$

The use of ( $pK_{open}$ ) and closed ( $pK_{closed}$ ) microscopic states will transform Eq. (6) into the following functional form representing the ratio of the open to closed states where both states are in the protonated form.:

$$R_{oc} = \frac{\frac{10^{-pK_{open}}}{10^{-pH}} + 1}{\frac{10^{-pK_{closed}}}{10^{-pH}} + 1} \frac{[OpenH]}{[ClosedH]} = \frac{10^{-pK_{open}} + 10^{-pH}}{10^{-pK_{closed}} + 10^{-pH}} \frac{[OpenH]}{[ClosedH]} \quad (7)$$

Here, the first term is pH-dependent ( $K^{pH}$  term) and the second term is pH-independent ( $K^0$  term) and is related to the free energy difference between the two states:

$$K^0 = \frac{[\text{OpenH}]}{[\text{ClosedH}]} = \exp\left(-\frac{\Delta G}{k_B T}\right) \quad (8)$$

From previous studies,<sup>24</sup> the relationship between the microscopic  $pK_a$  of both closed and open states are the apparent (macroscopic)  $pK_a$  ( $pK_{app}$ ) of the system can be obtained

$$pK_{app} = -\log\left(\frac{[\text{OpenH}]}{[\text{OpenH}] + [\text{ClosedH}]} K_{open} + \frac{[\text{ClosedH}]}{[\text{OpenH}] + [\text{ClosedH}]} K_{closed}\right) \quad (9)$$

A series of rearrangement will then lead to the ratio  $[\text{OpenH}]/[\text{ClosedH}]$ :

$$10^{-pK_{app}} ([\text{OpenH}] + [\text{ClosedH}]) = [\text{OpenH}] K_{open} + [\text{ClosedH}] K_{closed} \quad (10)$$

$$[\text{OpenH}] (10^{-pK_{app}} - K_{open}) = [\text{ClosedH}] (K_{closed} - 10^{-pK_{app}}) \quad (11)$$

$$\frac{[\text{OpenH}]}{[\text{ClosedH}]} = \frac{(K_{closed} - 10^{-pK_{app}})}{(10^{-pK_{app}} - K_{open})} = -\frac{(10^{-pK_{closed}} - 10^{-pK_{app}})}{(10^{-pK_{open}} - 10^{-pK_{app}})} \quad (12)$$

Combining Eq. 7 and Eq. 12 we can now obtain the  $R_{OC}$  for the two-state model:

$$R_{OC} = -\frac{(10^{-pK_{open}} + 10^{-pH}) (10^{-pK_{closed}} - 10^{-pK_{app}})}{(10^{-pK_{closed}} + 10^{-pH}) (10^{-pK_{open}} - 10^{-pK_{app}})} \quad (13)$$

### *Estimation of apparent $pK_a$*

Here,  $pK_{app}$  refers to the apparent (macroscopic)  $pK_a$  that we estimated to be 7.8— which is a pH value at which the fraction of the open state, determined from experiment (Table 2 of the manuscript), corresponds to 0.5 (considering pH range 6.1 to 8.1).

The values of  $R_{oc}$  at different pH can then be converted to the pH-dependent fraction of the open (deprotonated) state, considering the following expression:

$$F_{open} = R_{OC} / (R_{OC} + 1) \quad (2)$$

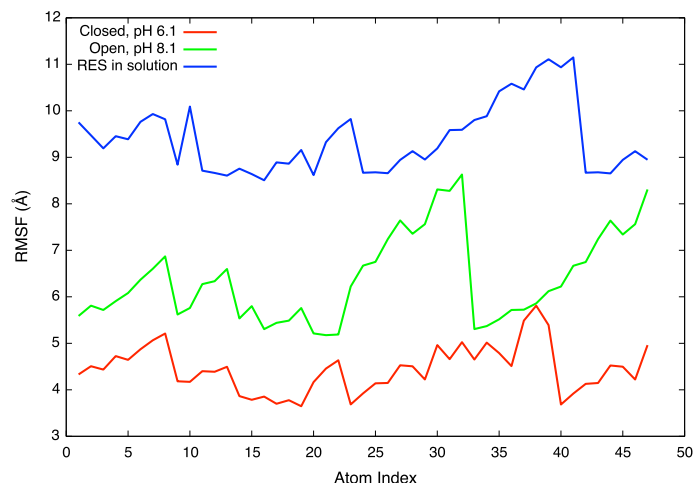

**Figure S4.** All-atom RMSF of the chromophore in the closed state (pH=6.1), open state (pH=8.1), and in solution shows its fluctuations broken down by atom.

## REFERENCES

- (1) Tomasi, J.; Mennucci, B.; Cammi, R. *Chem. Rev.* **2005**, *105*, 2999–3094.
- (2) Nemukhin, A. V; Topol, I. A.; Burt, S. K. *J. Chem. Theory Comput.* **2005**, *2*, 292–299.
- (3) Demachy, I.; Ridard, J.; Laguitton-Pasquier, H.; Durnerin, E.; Vallverdu, G.; Archirel, P.; Lévy, B. *J. Phys. Chem. B* **2005**, *109*, 24121–24133.
- (4) Nifosí, R.; Amat, P.; Tozzini, V. *J. Comput. Chem.* **2007**, *28*, 2366–2377.
- (5) M. J. Frisch, G. W. Trucks, H. B. Schlegel, G. E. Scuseria, M. A. Robb, J. R. Cheeseman, J. A. Montgomery, Jr., T. Vreven, K. N. Kudin, J. C. Burant, J. M. Millam, S. S. Iyengar, J. Tomasi, V. Barone, B. Mennucci, M. Cossi, G. Scalmani, N. Rega, G. A. Pet, and J. A. P. Gaussian 03, Revision A.1, 2003.
- (6) Sarkisyan, K. S.; Yampolsky, I. V; Solntsev, K. M.; Lukyanov, S. A.; Lukyanov, K. A.; Mishin, A. S. *Sci. Rep.* **2012**, *2*, 1–5.
- (7) Wanko, M.; Hoffmann, M.; Strodel, P.; Koslowski, A.; Thiel, W.; Neese, F.; Frauenheim, T.; Elstner, M. *J. Phys. Chem. B* **2005**, *109*, 3606–3615.
- (8) Marcus D Hanwell, Donald E Curtis, David C Lonie, Tim Vandermeersch, E. Z. and G. R. H. *J. Cheminform.* **2012**, *4*, 1–17.



- (9) Goh, G. B.; Hulbert, B. S.; Zhou, H.; Brooks III, C. L. *Proteins: Struct., Funct., Bioinf.* **2014**, DOI: 10.1002/prot.24499.
- (10) Goh, G. B.; Knight, J. L.; Brooks III, C. L. *J. Chem. Theory Comput.* **2011**, *8*, 36–46.
- (11) Lelimosin, M.; Noirclerc-Savoie, M.; Lazareno-Saez, C.; Paetzold, B.; Le Vot, S.; Chazal, R.; Macheboeuf, P.; Field, M. J.; Bourgeois, D.; Royant, A. *Biochemistry* **2009**, *48*, 10038–10046.
- (12) The PyMOL Molecular Graphics System, Version 1.2r3pre.
- (13) Brooks, B. R.; Brooks, C. L.; Mackerell, A. D.; Nilsson, L.; Petrella, R. J.; Roux, B.; Won, Y.; Archontis, G.; Bartels, C.; Boresch, S.; Caflisch, A.; Caves, L.; Cui, Q.; Dinner, A. R.; Feig, M.; Fischer, S.; Gao, J.; Hodoscek, M.; Im, W.; Kuczera, K.; Lazaridis, T.; Ma, J.; Ovchinnikov, V.; Paci, E.; Pastor, R. W.; Post, C. B.; Pu, J. Z.; Schaefer, M.; Tidor, B.; Venable, R. M.; Woodcock, H. L.; Wu, X.; Yang, W.; York, D. M.; Karplus, M. *J. Comput. Chem.* **2009**, *30*, 1545–1614.
- (14) Feig, M.; Karanicolas, J.; Brooks III, C. L. *J. Mol. Graph. Model.* **2004**, *22*, 377–395.
- (15) Halgren, T. A. *J. Comput. Chem.* **1996**, *17*, 490–519.
- (16) Yesselman, J. D.; Price, D. J.; Knight, J. L.; Brooks III, C. L. *J. Comput. Chem* **2012**, *33*, 189–202.
- (17) Kong, X.; III, C. L. B. *J. Chem. Phys.* **1996**, *105*, 2414–2423.
- (18) Van Gunsteren, W. F.; Berendsen, H. J. C. *Mol. Phys.* **1977**, *34*, 1311–1327.
- (19) Knight, J. L.; Brooks III, C. L. *J. Chem. Theory Comput.* **2011**, *7*, 2728–2739.
- (20) Huber, G. A.; Kim, S. *Biophys. J.* **1996**, *70*, 97–110.
- (21) Dickson, A.; Warmflash, A.; Dinner, A. R. *J. Chem. Phys.* **2009**, *131*, -.
- (22) Dickson, A.; Maienschein-Cline, M.; Tovo-Dwyer, A.; Hammond, J. R.; Dinner, A. R. *J. Chem. Theory Comput.* **2011**, *7*, 2710–2720.
- (23) Dickson, A.; Brooks III, C. L. *J. Phys. Chem. B* **2014**, *118*, 3532–3542.
- (24) Goh, G. B.; Laricheva, E. N.; Brooks III, C. L. *J. Am. Chem. Soc.* **2014**.

## *CHARMM Parameters of Model Compound*

### Geometry (xyz coordinates)

|     |        |        |        |
|-----|--------|--------|--------|
| N   | -2.915 | 2.737  | -0.784 |
| C   | -3.420 | 1.569  | -1.466 |
| C3  | -2.629 | 0.321  | -1.128 |
| O   | -3.220 | -0.748 | -0.956 |
| C5  | -3.365 | 1.795  | -2.950 |
| C6  | -4.289 | 2.876  | -3.540 |
| C7  | -3.884 | 3.283  | -4.925 |
| C8  | -5.762 | 2.424  | -3.495 |
| N9  | -1.317 | 0.467  | -1.016 |
| C10 | -0.417 | -0.662 | -0.609 |
| C11 | 0.282  | -1.179 | -1.881 |
| C12 | 0.911  | -0.138 | -2.803 |
| O13 | 1.207  | -2.197 | -1.501 |
| C14 | 0.455  | -0.105 | 0.450  |
| N15 | 1.669  | 0.409  | 0.282  |
| N16 | 0.055  | -0.075 | 1.755  |
| C17 | 1.033  | 0.481  | 2.507  |
| O18 | 0.991  | 0.661  | 3.751  |
| C19 | 2.098  | 0.805  | 1.565  |
| C20 | -1.183 | -0.541 | 2.275  |
| C21 | -1.413 | -1.833 | 2.804  |
| O22 | -2.362 | -2.050 | 3.572  |
| C23 | 3.296  | 1.385  | 1.842  |
| C24 | 4.296  | 1.791  | 0.775  |
| C25 | 4.272  | 1.575  | -0.535 |
| C26 | 5.512  | 2.519  | 1.006  |
| C27 | 6.119  | 2.674  | -0.234 |
| N28 | 5.340  | 2.080  | -1.207 |
| C29 | 6.101  | 3.035  | 2.179  |
| C30 | 7.349  | 3.356  | -0.349 |
| C31 | 7.299  | 3.703  | 2.089  |
| C32 | 7.903  | 3.855  | 0.845  |
| N33 | -0.579 | -2.759 | 2.364  |
| C34 | -0.738 | -4.170 | 2.723  |
| C35 | 0.620  | -4.696 | 3.183  |
| O36 | 1.199  | -5.625 | 2.629  |
| C37 | -1.386 | -5.001 | 1.601  |
| C38 | -2.874 | -4.595 | 1.435  |
| C39 | -0.645 | -4.886 | 0.258  |
| H   | 7.839  | 3.488  | -1.302 |
| H41 | 8.844  | 4.382  | 0.793  |
| H42 | 7.767  | 4.106  | 2.975  |
| H43 | 5.617  | 2.907  | 3.136  |
| H44 | 3.497  | 1.050  | -1.075 |
| H45 | 3.554  | 1.570  | 2.895  |
| H46 | -0.470 | -1.741 | -2.473 |
| H47 | 1.691  | 0.435  | -2.257 |
| H48 | 0.133  | 0.571  | -3.158 |
| H49 | 1.385  | -0.641 | -3.673 |
| H50 | -3.916 | 2.405  | -5.606 |
| H51 | -2.848 | 3.685  | -4.913 |
| H52 | -4.581 | 4.057  | -5.311 |
| H53 | -4.262 | 3.770  | -2.881 |
| H54 | -6.071 | 2.233  | -2.445 |
| H55 | -5.888 | 1.487  | -4.078 |

|     |        |        |        |
|-----|--------|--------|--------|
| H56 | -6.414 | 3.218  | -3.918 |
| H57 | -3.618 | 0.834  | -3.444 |
| H58 | -2.322 | 2.071  | -3.207 |
| H59 | -4.479 | 1.412  | -1.170 |
| H60 | -2.949 | -3.517 | 1.175  |
| H61 | -3.422 | -4.769 | 2.386  |
| H62 | -3.340 | -5.190 | 0.620  |
| H63 | -1.322 | -6.081 | 1.855  |
| H64 | 0.402  | -5.241 | 0.368  |
| H65 | -0.627 | -3.826 | -0.075 |
| H66 | -1.152 | -5.510 | -0.508 |
| H67 | -1.912 | -0.434 | 1.449  |
| H68 | -1.443 | 0.156  | 3.095  |
| C69 | 1.071  | -4.250 | 3.997  |
| H70 | -1.480 | -4.254 | 3.545  |
| H71 | 0.307  | -3.705 | 4.592  |
| H72 | 1.840  | -3.527 | 3.651  |
| H73 | 1.540  | -5.026 | 4.638  |
| H74 | -1.029 | -1.465 | -0.145 |
| H75 | 5.519  | 2.029  | -2.199 |
| H76 | -0.867 | 1.338  | -1.198 |
| H77 | -2.603 | 3.527  | -1.208 |
| C78 | -2.945 | 2.582  | 0.224  |
| H79 | 0.192  | -2.540 | 1.771  |
| H80 | 1.985  | -1.739 | -1.176 |
| H81 | -2.074 | 1.967  | 0.534  |
| H82 | -3.878 | 2.044  | 0.494  |
| H83 | -2.903 | 3.556  | 0.756  |

#### Atom types and charges

|          |      |           |
|----------|------|-----------|
| GROUP    |      |           |
| ATOM N   | N311 | -0.500000 |
| ATOM C   | C311 | -0.020000 |
| ATOM C3  | C201 | 0.510000  |
| ATOM O   | O2D1 | -0.510000 |
| ATOM C5  | C321 | -0.180000 |
| ATOM C6  | C311 | -0.090000 |
| ATOM C7  | C331 | -0.270000 |
| ATOM C8  | C331 | -0.270000 |
| ATOM N9  | N2S1 | -0.310000 |
| ATOM C78 | C331 | -0.200000 |
| ATOM H50 | HGA3 | 0.090000  |
| ATOM H51 | HGA3 | 0.090000  |
| ATOM H52 | HGA3 | 0.090000  |
| ATOM H53 | HGA1 | 0.090000  |
| ATOM H54 | HGA3 | 0.090000  |
| ATOM H55 | HGA3 | 0.090000  |
| ATOM H56 | HGA3 | 0.090000  |
| ATOM H57 | HGA2 | 0.090000  |
| ATOM H58 | HGA2 | 0.090000  |
| ATOM H59 | HGA1 | 0.090000  |
| ATOM H76 | HGP1 | 0.310000  |
| ATOM H77 | HPA1 | 0.360000  |
| ATOM H81 | HGA3 | 0.090000  |
| ATOM H82 | HGA3 | 0.090000  |
| ATOM H83 | HGA3 | 0.090000  |
| GROUP    |      |           |
| ATOM C10 | C311 | -0.090000 |

|       |     |      |           |
|-------|-----|------|-----------|
| ATOM  | C11 | C311 | 0.140000  |
| ATOM  | C12 | C331 | -0.270000 |
| ATOM  | O13 | O311 | -0.650000 |
| ATOM  | H46 | HGA1 | 0.090000  |
| ATOM  | H47 | HGA3 | 0.090000  |
| ATOM  | H48 | HGA3 | 0.090000  |
| ATOM  | H49 | HGA3 | 0.090000  |
| ATOM  | H74 | HGA1 | 0.090000  |
| ATOM  | H80 | HGP1 | 0.420000  |
| GROUP |     |      |           |
| ATOM  | C14 | C253 | 0.460000  |
| ATOM  | N15 | N250 | -0.680000 |
| ATOM  | N16 | N251 | -0.200000 |
| ATOM  | C17 | C253 | 0.620000  |
| ATOM  | O18 | O2D1 | -0.490000 |
| ATOM  | C19 | C251 | 0.260000  |
| ATOM  | C20 | C321 | -0.180000 |
| ATOM  | C21 | C201 | 0.510000  |
| ATOM  | O22 | O2D1 | -0.510000 |
| ATOM  | H67 | HGA2 | 0.090000  |
| ATOM  | H68 | HGA2 | 0.090000  |
| GROUP |     |      |           |
| ATOM  | C23 | C2D1 | -0.090000 |
| ATOM  | C24 | C251 | -0.160000 |
| ATOM  | C25 | C251 | -0.040000 |
| ATOM  | C26 | C2C0 | 0.030000  |
| ATOM  | C27 | C2C0 | 0.150000  |
| ATOM  | N28 | N251 | -0.520000 |
| ATOM  | C29 | C261 | -0.115000 |
| ATOM  | C30 | C261 | -0.115000 |
| ATOM  | C31 | C261 | -0.115000 |
| ATOM  | C32 | C261 | -0.115000 |
| ATOM  | H   | HG61 | 0.115000  |
| ATOM  | H41 | HG61 | 0.115000  |
| ATOM  | H42 | HG61 | 0.115000  |
| ATOM  | H43 | HG61 | 0.115000  |
| ATOM  | H44 | HG52 | 0.140000  |
| ATOM  | H45 | HGA4 | 0.150000  |
| ATOM  | H75 | HGP1 | 0.370000  |
| GROUP |     |      |           |
| ATOM  | N33 | N2S1 | -0.310000 |
| ATOM  | C34 | C311 | 0.010000  |
| ATOM  | C35 | C205 | 0.350000  |
| ATOM  | O36 | O2D1 | -0.490000 |
| ATOM  | C37 | C311 | -0.090000 |
| ATOM  | C38 | C331 | -0.270000 |
| ATOM  | C39 | C331 | -0.270000 |
| ATOM  | H60 | HGA3 | 0.090000  |
| ATOM  | H61 | HGA3 | 0.090000  |
| ATOM  | H62 | HGA3 | 0.090000  |
| ATOM  | H63 | HGA1 | 0.090000  |
| ATOM  | H64 | HGA3 | 0.090000  |
| ATOM  | H65 | HGA3 | 0.090000  |
| ATOM  | H66 | HGA3 | 0.090000  |
| ATOM  | C69 | C331 | -0.230000 |
| ATOM  | H70 | HGA1 | 0.090000  |
| ATOM  | H71 | HGA3 | 0.090000  |
| ATOM  | H72 | HGA3 | 0.090000  |
| ATOM  | H73 | HGA3 | 0.090000  |
| ATOM  | H79 | HGP1 | 0.310000  |

List of bonded parameters

|      |      |        |        |
|------|------|--------|--------|
| C311 | N311 | 263.00 | 1.4740 |
| HPA1 | N311 | 447.80 | 1.0190 |
| C331 | N311 | 255.00 | 1.4630 |
| C201 | C311 | 250.00 | 1.4900 |
| C311 | C321 | 222.50 | 1.5380 |
| C311 | HGA1 | 309.00 | 1.1110 |
| C201 | O2D1 | 620.00 | 1.2300 |
| C201 | N2S1 | 370.00 | 1.3450 |
| C321 | HGA2 | 309.00 | 1.1110 |
| C311 | C331 | 222.50 | 1.5380 |
| C331 | HGA3 | 322.00 | 1.1110 |
| C311 | N2S1 | 320.00 | 1.4300 |
| HGP1 | N2S1 | 440.00 | 0.9970 |
| C311 | C311 | 222.50 | 1.5000 |
| C253 | C311 | 250.00 | 1.4900 |
| C311 | O311 | 428.00 | 1.4200 |
| HGP1 | O311 | 545.00 | 0.9600 |
| C253 | N250 | 400.00 | 1.3200 |
| C253 | N251 | 320.00 | 1.3740 |
| C251 | N250 | 400.00 | 1.3800 |
| C321 | N251 | 400.00 | 1.4580 |
| C253 | O2D1 | 570.00 | 1.2350 |
| C251 | C253 | 340.00 | 1.4050 |
| C2D1 | C251 | 340.00 | 1.4050 |
| C201 | C321 | 250.00 | 1.4900 |
| C2D1 | HGA4 | 360.50 | 1.1000 |
| C251 | C251 | 410.00 | 1.3600 |
| C251 | C2C0 | 350.00 | 1.4300 |
| C251 | N251 | 400.00 | 1.3800 |
| C251 | HG52 | 375.00 | 1.0830 |
| C2C0 | C2C0 | 360.00 | 1.3850 |
| C261 | C2C0 | 300.00 | 1.3600 |
| C2C0 | N251 | 300.00 | 1.3750 |
| HGP1 | N251 | 474.00 | 1.0100 |
| C261 | C261 | 305.00 | 1.3750 |
| C261 | HG61 | 340.00 | 1.0800 |
| C205 | C311 | 200.00 | 1.5220 |
| C205 | O2D1 | 570.00 | 1.2350 |
| C205 | C331 | 220.00 | 1.5150 |

List of angle parameters

|      |      |      |       |        |
|------|------|------|-------|--------|
| 201  | C311 | N311 | 50.00 | 107.00 |
| C321 | C311 | N311 | 67.70 | 107.50 |
| HGA1 | C311 | N311 | 32.40 | 109.50 |
| C311 | N311 | HPA1 | 45.00 | 104.00 |
| C311 | N311 | C331 | 58.35 | 113.50 |
| HPA1 | N311 | C331 | 45.00 | 104.00 |
| HGA3 | C331 | N311 | 30.50 | 109.70 |
| O2D1 | C201 | C311 | 80.00 | 121.00 |
| N2S1 | C201 | C311 | 80.00 | 116.50 |
| C201 | C311 | C321 | 52.00 | 108.00 |
| C201 | C311 | HGA1 | 50.00 | 109.50 |
| HGA1 | C311 | C321 | 34.50 | 110.10 |
| C311 | C321 | C311 | 58.35 | 113.50 |
| C311 | C321 | HGA2 | 33.43 | 110.10 |
| N2S1 | C201 | O2D1 | 80.00 | 122.50 |

|      |      |      |        |        |
|------|------|------|--------|--------|
| C201 | N2S1 | C311 | 50.00  | 120.00 |
| C201 | N2S1 | HGP1 | 34.00  | 123.00 |
| C331 | C311 | C321 | 53.35  | 114.00 |
| HGA2 | C321 | HGA2 | 35.50  | 109.00 |
| C331 | C311 | C331 | 53.35  | 114.00 |
| HGA1 | C311 | C331 | 34.50  | 110.10 |
| C311 | C331 | HGA3 | 33.43  | 110.10 |
| HGA3 | C331 | HGA3 | 35.50  | 108.40 |
| C311 | C311 | N2S1 | 70.00  | 113.50 |
| C253 | C311 | N2S1 | 50.00  | 107.00 |
| HGA1 | C311 | N2S1 | 48.00  | 108.00 |
| C311 | N2S1 | HGP1 | 35.00  | 117.00 |
| C253 | C311 | C311 | 52.00  | 108.00 |
| HGA1 | C311 | C311 | 34.50  | 110.10 |
| C311 | C311 | C331 | 53.35  | 108.50 |
| C311 | C311 | 0311 | 75.70  | 110.10 |
| N250 | C253 | C311 | 100.00 | 113.00 |
| N251 | C253 | C311 | 20.00  | 112.50 |
| C253 | C311 | HGA1 | 50.00  | 109.50 |
| 0311 | C311 | C331 | 75.70  | 110.10 |
| HGA1 | C311 | 0311 | 45.90  | 108.89 |
| C311 | 0311 | HGP1 | 50.00  | 106.00 |
| N251 | C253 | N250 | 100.00 | 113.00 |
| C253 | N250 | C251 | 130.00 | 103.50 |
| C253 | N251 | C253 | 130.00 | 107.50 |
| C253 | N251 | C321 | 70.00  | 126.90 |
| C253 | C251 | N250 | 130.00 | 110.00 |
| C2D1 | C251 | N250 | 130.00 | 110.00 |
| 02D1 | C253 | N251 | 65.00  | 127.80 |
| C251 | C253 | N251 | 130.00 | 106.00 |
| C201 | C321 | N251 | 50.00  | 107.00 |
| HGA2 | C321 | N251 | 33.43  | 110.10 |
| C251 | C253 | 02D1 | 30.00  | 121.00 |
| C2D1 | C251 | C253 | 48.00  | 123.50 |
| C251 | C2D1 | C251 | 90.00  | 107.20 |
| HGA4 | C2D1 | C251 | 52.00  | 119.50 |
| 02D1 | C201 | C321 | 80.00  | 121.00 |
| N2S1 | C201 | C321 | 80.00  | 116.50 |
| C201 | C321 | HGA2 | 33.00  | 109.50 |
| C2D1 | C251 | C251 | 70.00  | 106.90 |
| C2D1 | C251 | C2C0 | 85.00  | 105.70 |
| C2C0 | C251 | C251 | 85.00  | 105.70 |
| C251 | C251 | N251 | 130.00 | 106.00 |
| C251 | C251 | HG52 | 22.00  | 130.00 |
| C251 | C2C0 | C2C0 | 85.00  | 108.00 |
| C251 | C2C0 | C261 | 130.00 | 132.00 |
| HG52 | C251 | N251 | 25.00  | 124.00 |
| C251 | N251 | C2C0 | 85.00  | 110.00 |
| C251 | N251 | HGP1 | 30.00  | 125.50 |
| C261 | C2C0 | C2C0 | 50.00  | 120.00 |
| C2C0 | C2C0 | N251 | 100.00 | 105.70 |
| C261 | C261 | C2C0 | 50.00  | 120.00 |
| HG61 | C261 | C2C0 | 30.00  | 120.00 |
| C261 | C2C0 | N251 | 130.00 | 132.60 |
| C2C0 | N251 | HGP1 | 28.00  | 126.00 |
| HG61 | C261 | C261 | 30.00  | 120.00 |
| C261 | C261 | C261 | 40.00  | 120.00 |
| C205 | C311 | N2S1 | 50.00  | 107.00 |
| 02D1 | C205 | C311 | 80.00  | 121.00 |
| C331 | C205 | C311 | 30.00  | 114.00 |

|      |      |      |       |        |
|------|------|------|-------|--------|
| C205 | C311 | C311 | 52.00 | 108.00 |
| C205 | C311 | HGA1 | 50.00 | 109.50 |
| C331 | C205 | O2D1 | 80.00 | 121.00 |
| C205 | C331 | HGA3 | 33.00 | 109.50 |

List of dihedral parameters

|      |      |      |      |         |   |        |
|------|------|------|------|---------|---|--------|
| O2D1 | C201 | C311 | N311 | 0.0000  | 1 | 0.00   |
| N2S1 | C201 | C311 | N311 | 0.6000  | 1 | 0.00   |
| C201 | C311 | N311 | HPA1 | 0.0000  | 1 | 0.00   |
| C201 | C311 | N311 | C331 | 0.2000  | 3 | 0.00   |
| C311 | C321 | C311 | N311 | 0.3000  | 3 | 180.00 |
| HGA2 | C321 | C311 | N311 | 0.1500  | 3 | 180.00 |
| C321 | C311 | N311 | HPA1 | 0.0000  | 3 | 0.00   |
| C321 | C311 | N311 | C331 | 0.0500  | 3 | 0.00   |
| HGA1 | C311 | N311 | HPA1 | 0.0000  | 3 | 0.00   |
| HGA1 | C311 | N311 | C331 | 0.0500  | 3 | 0.00   |
| C311 | N311 | C331 | HGA3 | 0.1500  | 3 | 180.00 |
| HPA1 | N311 | C331 | HGA3 | 0.4200  | 3 | 0.00   |
| O2D1 | C201 | C311 | C321 | 1.4000  | 1 | 0.00   |
| O2D1 | C201 | C311 | HGA1 | 0.0000  | 1 | 0.00   |
| C311 | N2S1 | C201 | C311 | 2.5000  | 2 | 180.00 |
| C311 | N2S1 | C201 | C311 | 1.6000  | 1 | 0.00   |
| HGP1 | N2S1 | C201 | C311 | 2.5000  | 2 | 180.00 |
| N2S1 | C201 | C311 | C321 | 0.0000  | 1 | 0.00   |
| N2S1 | C201 | C311 | HGA1 | 0.0000  | 1 | 0.00   |
| C201 | C311 | C321 | C311 | 0.2000  | 3 | 0.00   |
| C201 | C311 | C321 | HGA2 | 0.2000  | 3 | 0.00   |
| HGA1 | C311 | C321 | C311 | 0.1950  | 3 | 0.00   |
| HGA1 | C311 | C321 | HGA2 | 0.1950  | 3 | 0.00   |
| C311 | C321 | C311 | C331 | 0.2000  | 3 | 0.00   |
| C311 | N2S1 | C201 | O2D1 | 2.5000  | 2 | 180.00 |
| HGP1 | N2S1 | C201 | O2D1 | 2.5000  | 2 | 180.00 |
| C201 | N2S1 | C311 | C311 | 1.8000  | 1 | 0.00   |
| C201 | N2S1 | C311 | C253 | 0.2000  | 1 | 180.00 |
| C201 | N2S1 | C311 | HGA1 | 0.0000  | 1 | 0.00   |
| HGA3 | C331 | C311 | C321 | 0.2000  | 3 | 0.00   |
| C331 | C311 | C321 | HGA2 | 0.2000  | 3 | 0.00   |
| HGA3 | C331 | C311 | C331 | 0.1950  | 3 | 0.00   |
| HGA1 | C311 | C331 | HGA3 | 0.1950  | 3 | 0.00   |
| C331 | C311 | C311 | N2S1 | 0.2000  | 3 | 0.00   |
| O311 | C311 | C311 | N2S1 | 0.2000  | 3 | 0.00   |
| HGA1 | C311 | C311 | N2S1 | 0.2000  | 3 | 0.00   |
| C311 | C311 | N2S1 | HGP1 | 0.0000  | 1 | 0.00   |
| N250 | C253 | C311 | N2S1 | 0.4000  | 1 | 0.00   |
| N251 | C253 | C311 | N2S1 | 0.4000  | 1 | 0.00   |
| C253 | C311 | N2S1 | HGP1 | 0.0000  | 1 | 0.00   |
| HGA1 | C311 | N2S1 | HGP1 | 0.0000  | 1 | 0.00   |
| N250 | C253 | C311 | C311 | 11.0000 | 2 | 180.00 |
| N251 | C253 | C311 | C311 | 0.0000  | 1 | 0.00   |
| C253 | C311 | C311 | C331 | 0.2000  | 3 | 0.00   |
| C253 | C311 | C311 | O311 | 0.2000  | 3 | 0.00   |
| C253 | C311 | C311 | HGA1 | 0.2000  | 3 | 0.00   |
| HGA1 | C311 | C311 | C331 | 0.1950  | 3 | 0.00   |
| HGA1 | C311 | C311 | O311 | 0.1950  | 3 | 0.00   |
| HGA1 | C311 | C311 | HGA1 | 0.1950  | 3 | 0.00   |
| C311 | C311 | C331 | HGA3 | 0.2000  | 3 | 0.00   |
| C311 | C311 | O311 | HGP1 | 0.1800  | 2 | 0.00   |
| C311 | C311 | O311 | HGP1 | 0.3200  | 3 | 0.00   |
| C311 | C311 | O311 | HGP1 | 1.3300  | 1 | 0.00   |

|      |      |      |      |         |   |        |
|------|------|------|------|---------|---|--------|
| C251 | N250 | C253 | C311 | 14.0000 | 2 | 180.00 |
| N250 | C253 | C311 | HGA1 | 0.0000  | 1 | 0.00   |
| C253 | N251 | C253 | C311 | 0.0000  | 3 | 180.00 |
| C321 | N251 | C253 | C311 | 2.5000  | 2 | 180.00 |
| C321 | N251 | C253 | C311 | 1.6000  | 1 | 0.00   |
| N251 | C253 | C311 | HGA1 | 0.0000  | 1 | 0.00   |
| HGP1 | 0311 | C311 | C331 | 0.1800  | 2 | 0.00   |
| HGP1 | 0311 | C311 | C331 | 0.3200  | 3 | 0.00   |
| HGP1 | 0311 | C311 | C331 | 1.3300  | 1 | 0.00   |
| 0311 | C311 | C331 | HGA3 | 0.2000  | 3 | 0.00   |
| HGA1 | C311 | 0311 | HGP1 | 0.0000  | 3 | 0.00   |
| C253 | N251 | C253 | N250 | 14.0000 | 2 | 180.00 |
| C321 | N251 | C253 | N250 | 11.0000 | 2 | 180.00 |
| N251 | C253 | N250 | C251 | 14.0000 | 2 | 180.00 |
| C253 | N250 | C251 | C253 | 14.0000 | 2 | 180.00 |
| C253 | N250 | C251 | C2D1 | 14.0000 | 2 | 180.00 |
| C253 | N251 | C253 | 02D1 | 2.5900  | 2 | 180.00 |
| C253 | N251 | C253 | C251 | 14.0000 | 2 | 180.00 |
| C253 | N251 | C321 | C201 | 0.2000  | 1 | 180.00 |
| C253 | N251 | C321 | HGA2 | 0.0000  | 3 | 0.00   |
| N251 | C253 | C251 | N250 | 14.0000 | 2 | 180.00 |
| 02D1 | C253 | C251 | N250 | 0.0000  | 2 | 180.00 |
| C251 | C2D1 | C251 | N250 | 8.5000  | 2 | 180.00 |
| HGA4 | C2D1 | C251 | N250 | 2.7000  | 2 | 180.00 |
| 02D1 | C253 | N251 | C321 | 2.5900  | 2 | 180.00 |
| C2D1 | C251 | C253 | N251 | 4.0000  | 2 | 180.00 |
| C251 | C253 | N251 | C321 | 11.0000 | 2 | 180.00 |
| 02D1 | C201 | C321 | N251 | 0.0000  | 1 | 0.00   |
| N2S1 | C201 | C321 | N251 | 0.6000  | 1 | 0.00   |
| C2D1 | C251 | C253 | 02D1 | 1.0000  | 2 | 180.00 |
| C251 | C2D1 | C251 | C253 | 9.0000  | 2 | 180.00 |
| HGA4 | C2D1 | C251 | C253 | 1.0000  | 2 | 180.00 |
| C251 | C251 | C2D1 | C251 | 15.0000 | 2 | 180.00 |
| C2C0 | C251 | C2D1 | C251 | 2.0000  | 2 | 180.00 |
| 02D1 | C201 | C321 | HGA2 | 0.0000  | 3 | 180.00 |
| C311 | N2S1 | C201 | C321 | 2.5000  | 2 | 180.00 |
| C311 | N2S1 | C201 | C321 | 1.6000  | 1 | 0.00   |
| HGP1 | N2S1 | C201 | C321 | 2.5000  | 2 | 180.00 |
| N2S1 | C201 | C321 | HGA2 | 0.0000  | 3 | 0.00   |
| C201 | N2S1 | C311 | C205 | 0.2000  | 1 | 180.00 |
| HGA4 | C2D1 | C251 | C251 | 1.0000  | 2 | 180.00 |
| HGA4 | C2D1 | C251 | C2C0 | 1.0000  | 2 | 180.00 |
| C2D1 | C251 | C251 | N251 | 4.0000  | 2 | 180.00 |
| C2D1 | C251 | C251 | HG52 | 1.5000  | 2 | 180.00 |
| C2D1 | C251 | C2C0 | C2C0 | 4.0000  | 2 | 180.00 |
| C2D1 | C251 | C2C0 | C261 | 3.0000  | 2 | 180.00 |
| C2C0 | C2C0 | C251 | C251 | 4.0000  | 2 | 180.00 |
| C261 | C2C0 | C251 | C251 | 3.0000  | 2 | 180.00 |
| C2C0 | C251 | C251 | N251 | 4.0000  | 2 | 180.00 |
| C2C0 | C251 | C251 | HG52 | 2.8000  | 2 | 180.00 |
| C251 | C251 | N251 | C2C0 | 5.0000  | 2 | 180.00 |
| C251 | C251 | N251 | HGP1 | 1.0000  | 2 | 180.00 |
| C251 | C2C0 | C2C0 | N251 | 6.5000  | 2 | 180.00 |
| C251 | C2C0 | C2C0 | C261 | 1.5000  | 2 | 180.00 |
| C251 | C2C0 | C261 | C261 | 4.0000  | 2 | 180.00 |
| C251 | C2C0 | C261 | HG61 | 4.0000  | 2 | 180.00 |
| HG52 | C251 | N251 | C2C0 | 2.6000  | 2 | 180.00 |
| HG52 | C251 | N251 | HGP1 | 1.0000  | 2 | 180.00 |
| C251 | N251 | C2C0 | C2C0 | 1.5000  | 2 | 180.00 |
| C251 | N251 | C2C0 | C261 | 1.5000  | 2 | 180.00 |



|      |      |      |      |        |   |        |
|------|------|------|------|--------|---|--------|
| C261 | C261 | C2C0 | C2C0 | 3.0000 | 2 | 180.00 |
| HG61 | C261 | C2C0 | C2C0 | 3.0000 | 2 | 180.00 |
| C261 | C2C0 | C2C0 | N251 | 1.5000 | 2 | 180.00 |
| C261 | C2C0 | C2C0 | C261 | 3.0000 | 2 | 180.00 |
| 2C0  | C2C0 | N251 | HGP1 | 0.8500 | 2 | 180.00 |
| C261 | C261 | C261 | C2C0 | 3.0000 | 2 | 180.00 |
| HG61 | C261 | C261 | C2C0 | 3.0000 | 2 | 180.00 |
| C261 | C261 | C2C0 | N251 | 3.0000 | 2 | 180.00 |
| HG61 | C261 | C2C0 | N251 | 3.0000 | 2 | 180.00 |
| C261 | C2C0 | N251 | HGP1 | 0.2000 | 2 | 180.00 |
| HG61 | C261 | C261 | C261 | 4.2000 | 2 | 180.00 |
| HG61 | C261 | C261 | HG61 | 2.4000 | 2 | 180.00 |
| C261 | C261 | C261 | C261 | 3.1000 | 2 | 180.00 |
| 02D1 | C205 | C311 | N251 | 0.0000 | 1 | 0.00   |
| C331 | C205 | C311 | N251 | 0.2000 | 3 | 0.00   |
| C205 | C311 | N251 | HGP1 | 0.0000 | 1 | 0.00   |
| 02D1 | C205 | C311 | C311 | 1.4000 | 1 | 0.00   |
| 02D1 | C205 | C311 | HGA1 | 0.0000 | 1 | 0.00   |
| HGA3 | C331 | C205 | C311 | 0.0300 | 3 | 0.00   |
| C331 | C205 | C311 | C311 | 0.1580 | 3 | 0.00   |
| C331 | C205 | C311 | HGA1 | 0.0000 | 1 | 180.00 |
| C205 | C311 | C311 | C331 | 0.2000 | 3 | 0.00   |
| C205 | C311 | C311 | HGA1 | 0.2000 | 3 | 0.00   |
| HGA3 | C331 | C205 | 02D1 | 0.0000 | 3 | 180.00 |
| C331 | C205 | C311 | C311 | 0.1580 | 3 | 0.00   |
| C331 | C205 | C311 | HGA1 | 0.0000 | 1 | 180.00 |
| C205 | C311 | C311 | C331 | 0.2000 | 3 | 0.00   |
| C205 | C311 | C311 | HGA1 | 0.2000 | 3 | 0.00   |
| HGA3 | C331 | C205 | 02D1 | 0.0000 | 3 | 180.00 |

List of improper dihedral parameters

|      |      |      |      |          |   |      |
|------|------|------|------|----------|---|------|
| C201 | X    | X    | 02D1 | 120.0000 | 0 | 0.00 |
| N251 | X    | X    | HGP1 | 20.0000  | 0 | 0.00 |
| C253 | N250 | N251 | C311 | 96.0000  | 0 | 0.00 |
| C201 | C321 | N251 | 02D1 | 120.0000 | 0 | 0.00 |
| C205 | C311 | C331 | 02D1 | 90.0000  | 0 | 0.00 |

List of non-bonded parameters

|      |        |         |        |
|------|--------|---------|--------|
| C311 | 0.0000 | -0.0320 | 2.0000 |
| N311 | 0.0000 | -0.4500 | 2.0000 |
| HPA1 | 0.0000 | -0.0090 | 0.8750 |
| C331 | 0.0000 | -0.0780 | 2.0500 |
| C201 | 0.0000 | -0.1100 | 2.0000 |
| C321 | 0.0000 | -0.0560 | 2.0100 |
| HGA1 | 0.0000 | -0.0450 | 1.3400 |
| 02D1 | 0.0000 | -0.1200 | 1.7000 |
| N251 | 0.0000 | -0.2000 | 1.8500 |
| HGA2 | 0.0000 | -0.0350 | 1.3400 |
| HGA3 | 0.0000 | -0.0240 | 1.3400 |
| HGP1 | 0.0000 | -0.0460 | 0.2245 |
| C253 | 0.0000 | -0.0500 | 1.8000 |
| 0311 | 0.0000 | -0.1921 | 1.7650 |
| N250 | 0.0000 | -0.2000 | 1.8500 |
| N251 | 0.0000 | -0.2000 | 1.8500 |
| C251 | 0.0000 | -0.0730 | 1.9900 |
| C2D1 | 0.0000 | -0.0680 | 2.0900 |
| HGA4 | 0.0000 | -0.0310 | 1.2500 |
| C2C0 | 0.0000 | -0.0990 | 1.8600 |

|      |        |         |        |
|------|--------|---------|--------|
| HG52 | 0.0000 | -0.0460 | 0.9000 |
| C261 | 0.0000 | -0.0700 | 1.9924 |
| HG61 | 0.0000 | -0.0300 | 1.3582 |
| C205 | 0.0000 | -0.2300 | 1.7000 |
